# Supplementary material for: Viremia and Inflammatory Cytokines in Dengue: Interleukin-2 as a Biomarker of Infection, and Interferon-α and -γ as Markers of Primary versus Secondary Infection
Source: MDPI journal article supplement (doi:10.3390/pathogens12111362), 2023-11-17
Supplement: s1 [file s1]

## Supplementary Material

### **Viremia and inflammatory cytokines in dengue: interleukin-2 as a biomarker of infection, and Interferon- $\alpha$ and - $\gamma$ as markers of primary *versus* secondary infection**

Thaís Bonato de Arruda<sup>1†</sup>, Lorena Bavia<sup>1,2†</sup>, Ana Luiza Pamplona Mosimann<sup>1&</sup>, Mateus Nobrega Aoki<sup>1,3</sup>, Maria Lo Sarzi<sup>4</sup>, Ivete Conchon-Costa<sup>5</sup>, Pryscilla Fanini Wowk<sup>1&</sup>, Claudia Nunes Duarte dos Santos<sup>1</sup>, Wander Rogério Pavanelli<sup>5#</sup>, Guilherme Ferreira Silveira<sup>1#</sup>, Juliano Bordignon<sup>1#&</sup>

<sup>1</sup>Laboratório de Virologia Molecular, Instituto Carlos Chagas, Fiocruz, Curitiba, 81350-010, Paraná, Brazil;

<sup>2</sup>Departamento de Biologia Celular, Setor de Ciências Biológicas, Universidade Federal do Paraná (UFPR), Curitiba, 81531-980, Paraná, Brazil;

<sup>3</sup>Laboratório de Ciências & Tecnologias Aplicadas a Saúde, Instituto Carlos Chagas, Fiocruz, Curitiba, 81350-010, Paraná, Brazil;

<sup>4</sup>Secretaria Municipal de Saúde de Cambé, Cambé, 86057-970, Paraná, Brazil;

<sup>5</sup>Laboratório de Protozoologia Experimental, Universidade Estadual de Londrina, Londrina, 86057-970, Paraná, Brazil;

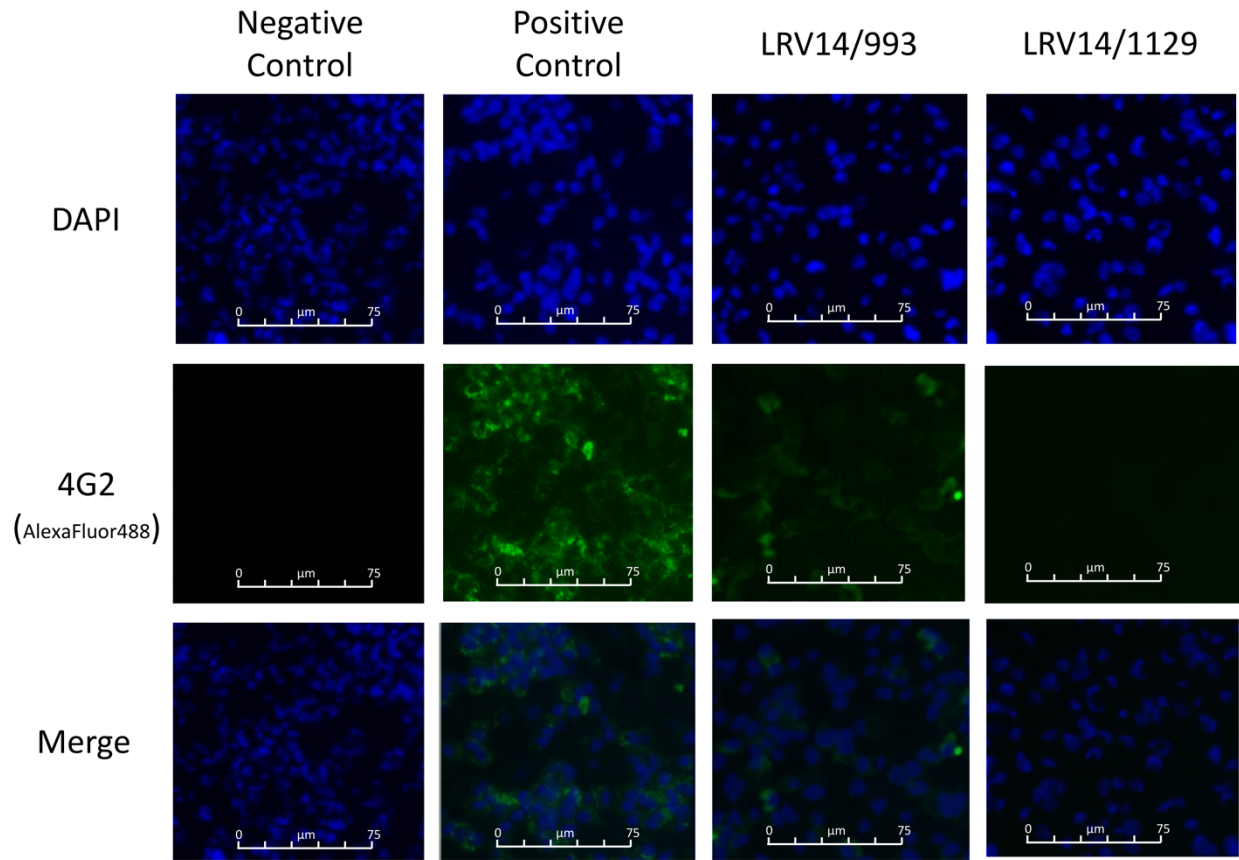

**Supplementary Figure S1: Representative images of immunofluorescence on C6/36 cells to confirm dengue virus diagnosis in serum samples.** Representative immunofluorescence assay of virus isolation on C6/36 with serum samples from dengue patients (LR14/1129 and LRV14/993). A mock infection was used as a negative control, and infection with DENV-4/TVP/360 MOI 0,1 was used as a positive control. After 7–14 days (depending on the cytopathic effect), the staining was made using anti-E flavivirus monoclonal antibody (4G2) followed by an anti-mouse conjugated with AlexaFluor488 and DAPI. Cells were then observed in an immunofluorescence microscope Nikon Eclipse 80i. The scale bar corresponds to 75  $\mu$ m.

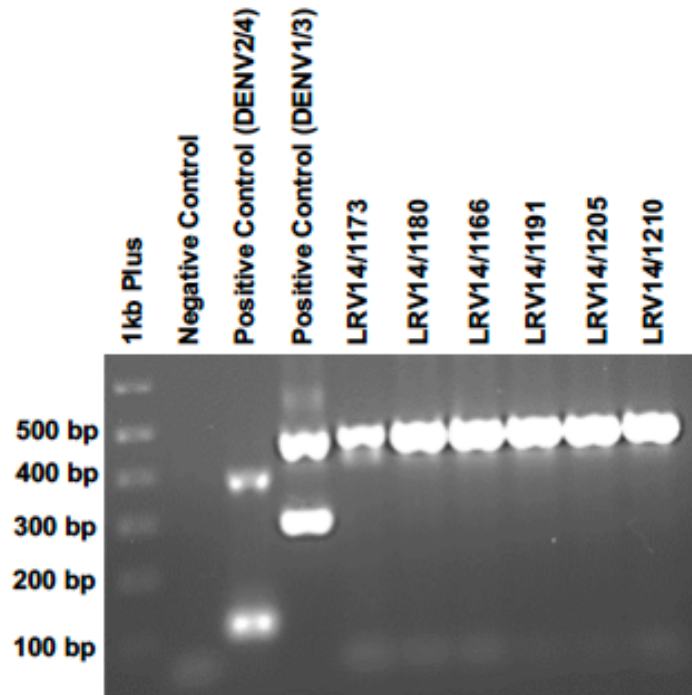

**Supplementary Figure S2: Representative agarose gel of one-step RT-PCR to confirm dengue virus diagnosis/serotype in serum samples.** After the virus isolation on C6/36, the cell culture supernatant of samples positive by immunofluorescence assays was tested by one-step RT-PCR for DENV serotyping. A 1% agarose gel stained with ethidium bromide showing the serotyping of DENV samples (LRV14/1173, LRV14/1180, LRV14/1166, LRV14/1191, LRV14/1205 and LRV14/1210). A mock control and mixture of RNAs from DENV1+3 (DENV-1/BR/90 and DENV3/BR/97-04) and DENV2+4 (DENV-2/BR/01-01 and DENV-4/TVP/360) were also included. Expected amplicons were 482 bp for DENV-1, 119 bp for DENV-2, 290 bp for DENV3, and 392 bp for DENV-4. A 1Kb plus ladder was also included as a control (ThermoFischerScientific©).

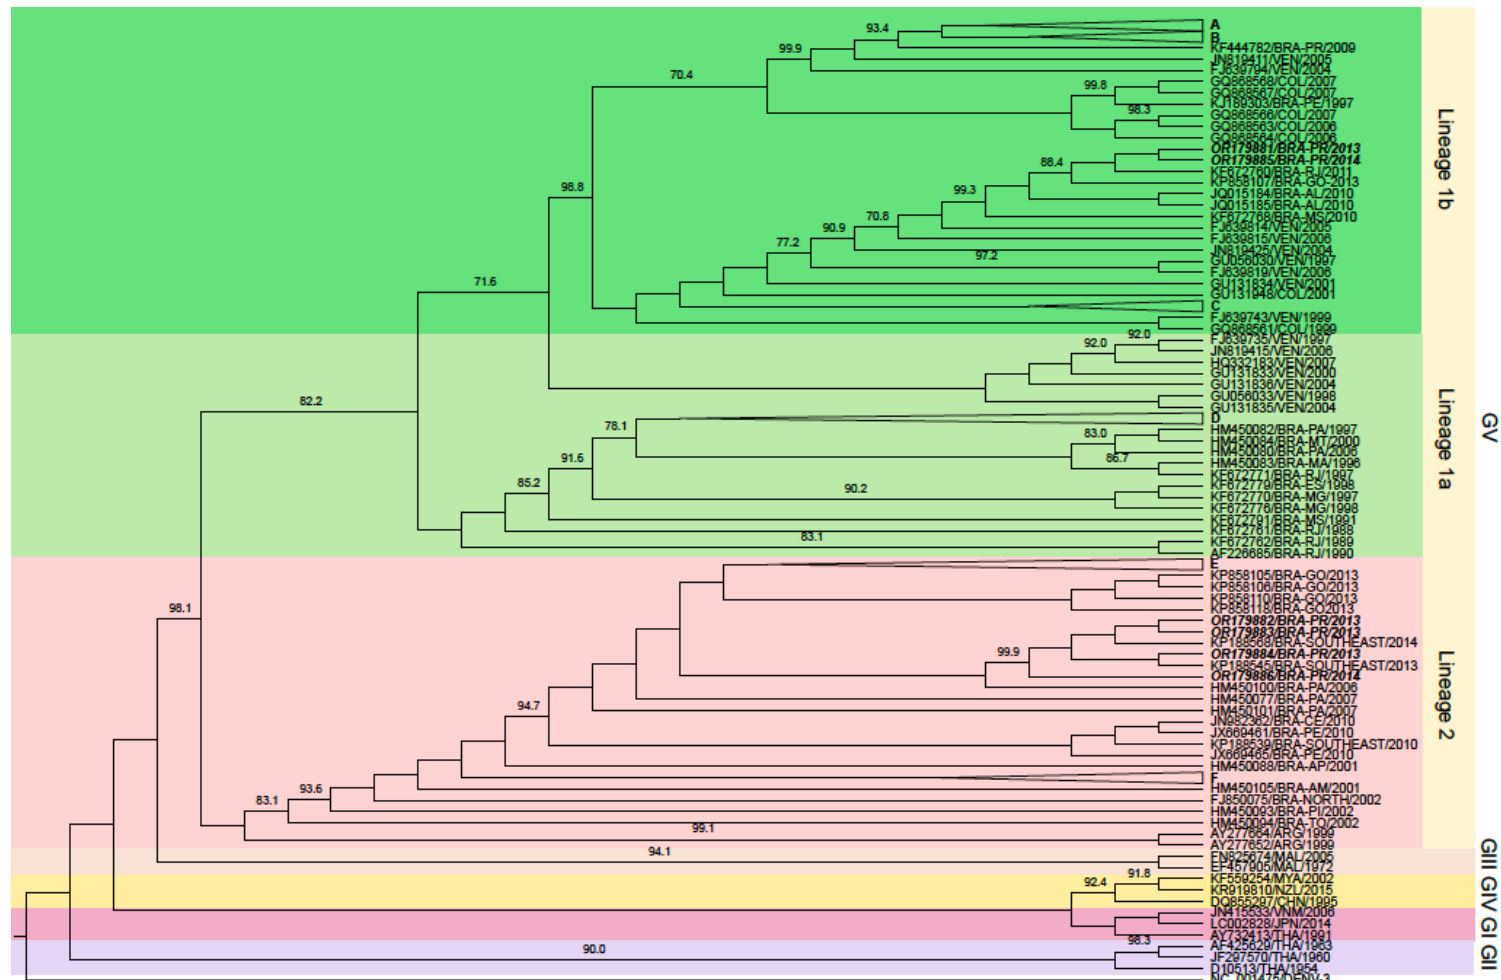

**Supplementary Figure S3: Phylogenetic analysis of the E coding region of *Dengue virus* strains from Cambé.** The phylogenetic tree was inferred through maximum likelihood using PhyML 3.0, with a GTR + G + I model. Left to the nodes are represented the bootstrap values >70 (1000 replicates). The tree was rooted in an external DENV-3 group (NC\_001475), and the tree branch length does not represent the evolutionary distance between groups. Some clades with support inferior to 10 were collapsed for better image resolution, hiding 88 strains (see Supplementary Table 1). Samples sequenced in the present work are highlighted in bold italics. Strains were nominated according to the GenBank (accession number/country/year).

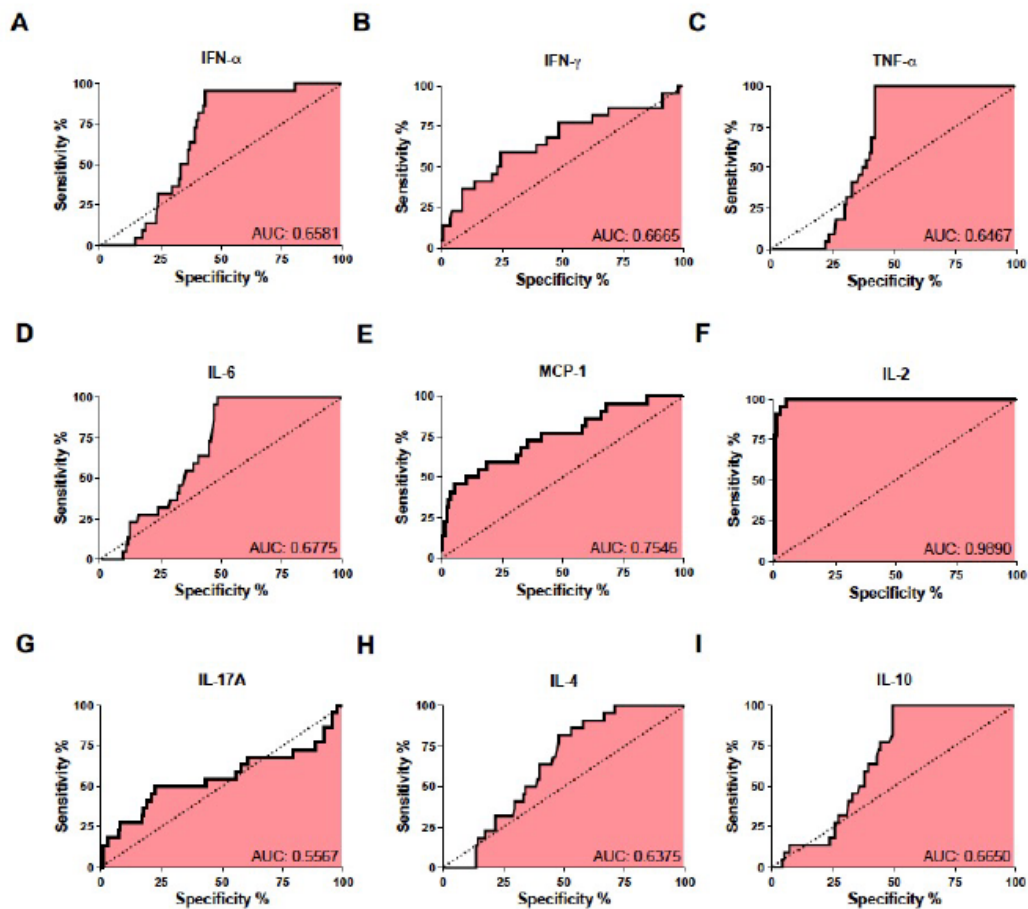

**Supplementary Figure S4. Area under the curve (AUC) analysis of cytokines/chemokines in acute phase dengue patients.** AUC for cytokines/chemokine IFN- $\alpha$  (A), IFN- $\gamma$  (B), TNF- $\alpha$  (C), IL-6 (D), MCP-1 (E), IL-2 (F), IL-17A (G), IL-4 (H) and IL-10 (I). The solid line represents the dots used to build the AUC curve, and the dashed lines represent the identity between specificity and sensitivity. AUC values are depicted in each graph.

**Supplementary Table S1:**

| <b>Name</b>          | <b>NCBI number</b> | <b>Country</b> | <b>City/Region</b>  | <b>Year</b> | <b>Clade</b> |
|----------------------|--------------------|----------------|---------------------|-------------|--------------|
| JN713897_BR_RR_2010  | JN713897           | Brazil         | Roraima             | 2010        | A            |
| KF444786/BRA-RR/2010 | KF444786           | Brazil         | Roraima             | 2010        | A            |
| KF444785/BRA-RR/2009 | KF444785           | Brazil         | Roraima             | 2009        | A            |
| KF444780/BRA-RR/2009 | KF444780           | Brazil         | Roraima             | 2009        | A            |
| HM450104/BRA-RR/2008 | HM450104           | Brazil         | Roraima             | 2008        | A            |
| KF444787/BRA-RR/2010 | KF444787           | Brazil         | Roraima             | 2010        | A            |
| KF444792/BRA-RR/2010 | KF444792           | Brazil         | Roraima             | 2010        | A            |
| KF444790/BRA-RR/2009 | KF444790           | Brazil         | Roraima             | 2009        | A            |
| KF444784/BRA-RR/2009 | KF444784           | Brazil         | Roraima             | 2009        | B            |
| KF444788/BRA-RR/2010 | KF444788           | Brazil         | Roraima             | 2010        | B            |
| KF444791/BRA-RR/2009 | KF444791           | Brazil         | Roraima             | 2009        | B            |
| KF444783/BRA-RR/2009 | KF444783           | Brazil         | Roraima             | 2009        | B            |
| KF444789/BRA-RR/2008 | KF444789           | Brazil         | Roraima             | 2008        | B            |
| FJ639740/VEN/1998    | FJ639740           | Venezuela      | Aragua              | 1998        | C            |
| FJ850104/VEN/2008    | FJ850104           | Venezuela      | Aragua              | 2008        | C            |
| GU131837/VEN/2005    | GU131837           | Venezuela      | Aragua              | 2005        | C            |
| GQ868560/COL/1998    | GQ868560           | Colombia       | Santander           | 1998        | C            |
| GQ868560/COL/1998    | GQ868559           | Colombia       | Santander           | 1998        | C            |
| AF425634/VEN/1997    | AF425634           | Venezuela      | Aragua              | 1997        | C            |
| HM450079/BRA-CE/1994 | HM450079           | Brazil         | Ceará               | 1994        | D            |
| JX669469/BRA-PE/1997 | JX669469           | Brazil         | Pernambuco          | 1997        | D            |
| AF311956/BRA-PE/1997 | AF311956           | Brazil         | Pernambuco          | 1997        | D            |
| KF672777/BRA-MG/1998 | KF672777           | Brazil         | Minas Gerais        | 1998        | D            |
| KF672792/BRA-RJ/1999 | KF672792           | Brazil         | Rio de Janeiro      | 1999        | D            |
| KF672763/BRA-ES/2000 | KF672763           | Brazil         | Espírito Santo      | 2000        | D            |
| KF672782/BRA-RJ/2000 | KF672782           | Brazil         | Rio de Janeiro      | 2000        | D            |
| HM450098/BRA-RN/2001 | HM450098           | Brazil         | Rio Grande do Norte | 2001        | D            |
| KF672783/BRA-ES/2002 | KF672783           | Brazil         | Espírito Santo      | 2002        | D            |
| KF672778/BRA-ES/1998 | KF672778           | Brazil         | Espírito Santo      | 1998        | D            |
| HM450090/BRA-MT/2002 | HM450090           | Brazil         | Mato Grosso         | 2002        | D            |
| HM450091/BRA-MT/2002 | HM450091           | Brazil         | Mato Grosso         | 2002        | D            |
| AY277658/ARG/2000    | AY277658           | Argentina      | Buenos Aires        | 2000        | D            |
| JX669471/BRA/1999    | JX669471           | Brazil         | Pernambuco          | 1999        | D            |
| KF672764/BRA-RJ/2001 | KF672764           | Brazil         | Rio de Janeiro      | 2001        | D            |
| KF672788/BRA-RJ/2001 | KF672788           | Brazil         | Rio de Janeiro      | 2001        | D            |
| HM450086/BRA-CE/2000 | HM450086           | Brazil         | Ceará               | 2000        | D            |

|                      |          |           |                     |      |   |
|----------------------|----------|-----------|---------------------|------|---|
| JX669475/BRA-PE/2002 | JX669475 | Brazil    | Pernambuco          | 2002 | D |
| KF672773/BRA-RN/1997 | KF672773 | Brazil    | Rio Grande do Norte | 1997 | D |
| KF672775/BRA-CE/1998 | KF672775 | Brazil    | Ceará               | 1998 | D |
| KF672769/BRA-MG/1997 | KF672769 | Brazil    | Minas Gerais        | 1997 | D |
| KF672774/BRA-RJ/1998 | KF672774 | Brazil    | Rio de Janeiro      | 1998 | D |
| JX669468/BRA-PE/1997 | JX669468 | Brazil    | Pernambuco          | 1997 | D |
| KF672772/BRA-RJ/1997 | KF672772 | Brazil    | Rio de Janeiro      | 1997 | D |
| AF311958/BRA-PE/1997 | AF311958 | Brazil    | Pernambuco          | 1997 | D |
| AB519681/BRA-DF/2001 | AB519681 | Brazil    | Distrito Federal    | 2001 | D |
| AF513110/BRA-PR/2001 | AF513110 | Brazil    | Paraná              | 2001 | D |
| KF672787/BRA-PI/2000 | KF672787 | Brazil    | Piauí               | 2000 | D |
| JX669474/BRA-PE/2001 | JX669474 | Brazil    | Pernambuco          | 2001 | D |
| JX669473/BRA-PE/2001 | JX669473 | Brazil    | Pernambuco          | 2001 | D |
| JX669472/BRA-PE/2000 | JX669472 | Brazil    | Pernambuco          | 2000 | D |
| KP858119/BRA-GO/2013 | KP858119 | Brazil    | Goiás               | 2013 | E |
| KP858114/BRA-GO/2013 | KP858114 | Brazil    | Goiás               | 2013 | E |
| KC692513/ARG/2010    | KC692513 | Argentina | Buenos Aires        | 2010 | E |
| KY369949/BRA-SP/2013 | KY369949 | Brazil    | São Paulo           | 2013 | E |
| KC692511/ARG/2010    | KC692511 | Argentina | Buenos Aires        | 2010 | E |
| GU131863/BRA-SP/2008 | GU131863 | Brazil    | São Paulo           | 2008 | E |
| KP188567/BRA-SP/2013 | KP188567 | Brazil    | São Paulo           | 2013 | E |
| KP858113/BRA-GO/2013 | KP858113 | Brazil    | Goiás               | 2013 | E |
| KP858112/BRA-GO/2013 | KP858112 | Brazil    | Goiás               | 2013 | E |
| KP858117/BRA-GO/2013 | KP858117 | Brazil    | Goiás               | 2013 | E |
| KP858115/BRA-GO/2013 | KP858115 | Brazil    | Goiás               | 2013 | E |
| KP858109/BRA-GO/2013 | KP858109 | Brazil    | Goiás               | 2013 | E |
| JX669464/BRA-PE/2010 | JX669464 | Brazil    | Pernambuco          | 2010 | E |
| KF672785/BRA-ES/2010 | KF672785 | Brazil    | Espírito Santo      | 2010 | E |
| KF672759/BRA-RJ/2010 | KF672759 | Brazil    | Rio de Janeiro      | 2010 | E |
| KP858116/BRA-GO/2013 | KP858116 | Brazil    | Goiás               | 2013 | E |
| KP858111/BRA-GO/2013 | KP858111 | Brazil    | Goiás               | 2013 | E |
| KP188544/BRA-SP/2012 | KP188544 | Brazil    | São Paulo           | 2012 | E |
| KP858108/BRA-GO/2013 | KP858108 | Brazil    | Goiás               | 2013 | E |
| KP858105/BRA-GO/2013 | KP858105 | Brazil    | Goiás               | 2013 | E |
| KP858110/BRA-GO/2013 | KP858110 | Brazil    | Goiás               | 2013 | E |
| KP858118/BRA-GO/2013 | KP858118 | Brazil    | Goiás               | 2013 | E |
| JN982362/BRA-CE/2010 | JN982362 | Brazil    | Ceará               | 2010 | F |
| JX669461/BRA-PE/2010 | JX669461 | Brazil    | Pernambuco          | 2010 | F |
| KP188539/BRA-SP/2010 | KP188539 | Brazil    | São Paulo           | 2010 | F |
| JX669465/BRA-PE/2010 | JX669465 | Brazil    | Pernambuco          | 2010 | F |
| HM450088/BRA-AP/2001 | HM450088 | Brazil    | Amapá               | 2001 | F |

|                         |          |        |                |      |   |
|-------------------------|----------|--------|----------------|------|---|
| HM450089/BRA-RR/2001    | HM450089 | Brazil | Roraima        | 2001 | F |
| HM450095/BRA-AM/2002    | HM450095 | Brazil | Amazonas       | 2002 | F |
| KF672789/BRA-ES/2001    | KF672789 | Brazil | Espírito Santo | 2001 | F |
| FJ850071/BRA-NORTH/2000 | FJ850071 | Brazil | Norte          | 2000 | F |
| HM450096/BRA-MA/2003    | HM450096 | Brazil | Maranhão       | 2003 | F |
| FJ850084/BRA-NORTH/2005 | FJ850084 | Brazil | Norte          | 2005 | F |
| HM450099/BRA-AP/2005    | HM450099 | Brazil | Amapá          | 2005 | F |
| FJ850070/BRA-NORTH/2000 | FJ850070 | Brazil | Norte          | 2000 | F |
| FJ850081/BRA-NORTH/2004 | FJ850081 | Brazil | Norte          | 2000 | F |
| HM450092/BRA-PI/2002    | HM450092 | Brazil | Piauí          | 2002 | F |

**Supplementary Table S2:** Correlation between viremia and cytokine/chemokine levels in the serum of DENV-infected patients.

| <b>Cytokines/Chemokines</b> | <b>Spearman (r)</b> | <b>95% confidence interval</b> | <b><i>p</i>-value</b> |
|-----------------------------|---------------------|--------------------------------|-----------------------|
| IFN- $\alpha$               | 0.1638              | -0.008386 to 0.3266            | 0.0548                |
| IFN- $\gamma$               | 0.01355             | -0.1588 to 0.1851              | 0.8747                |
| TNF- $\alpha$               | 0.1474              | -0.02523 to 0.3115             | 0.0845                |
| IL-2                        | 0.01459             | -0.1578 to 0.1861              | 0.8651                |
| IL-6                        | 0.1128              | -0.06034 to 0.2794             | 0.1877                |
| IL-4                        | 0.1603              | -0.1204 to 0.3234              | 0.0604                |
| IL-10                       | -0.07533            | -0.2442 to 0.09793             | 0.3799                |
| IL-17A                      | 0.04168             | -0.1312 to 0.2122              | 0.6274                |
| MCP-1                       | 0.09741             | -0.07585 to 0.2650             | 0.2557                |
